# Supplementary material for: Augmented COlorimetric NANoplasmonic (CONAN) Method for Grading Purity and Determine Concentration of EV Microliter Volume Solutions
Source: PubMed Central journal article supplement (PMC7028770; doi:10.3389/fbioe.2019.00452), 2020-02-12
Supplement: Data_Sheet_1.pdf [file Data_Sheet_1.pdf]

## Supplementary material

### “Augmented COlorimetric NANoplasmonic (CONAN) method for grading purity and determine concentration of EV microliter volume solutions”

Andrea Zendrini\*<sup>1,2</sup>, Lucia Paolini\*<sup>3,4</sup>, Sara Busatto<sup>4,5</sup>, Annalisa Radeghieri<sup>3,4</sup>, Miriam Romano<sup>3,4</sup>, Marca H. M. Wauben<sup>6</sup>, Martijn J. C. van Herwijnen<sup>6</sup>, Peter Nejsum<sup>7</sup>, Anne Borup<sup>7</sup>, Andrea Ridolfi<sup>4,8,9</sup>, Costanza Montis<sup>4,9</sup>, Paolo Bergese<sup>2,3,4</sup>

<sup>1</sup> Department of Animal Science, Food and Nutrition - Università Cattolica del Sacro Cuore via Emilia Parmense 84 29122 Piacenza, Italy.

<sup>2</sup> Consorzio Interuniversitario Nazionale per la Scienza e la Tecnologia dei Materiali – via Giuseppe Giusti 9 50121 Firenze, Italy

<sup>3</sup> Department of Molecular and Translational Medicine - University of Brescia viale Europa 11, 25123 Brescia, Italy.

<sup>4</sup> Consorzio Sistemi a Grande Interfase, Department of Chemistry – University of Florence via della Lastruccia 3 50019 Sesto Fiorentino, Italy.

<sup>5</sup> Department of Transplantation, Mayo Clinic, Jacksonville, FL 32224, USA.

<sup>6</sup> Department of Biochemistry and Cell Biology, Faculty of Veterinary Medicine, Utrecht University, Utrecht, The Netherlands.

<sup>7</sup> Department of Clinical Medicine, Faculty of Health, Aarhus University, Palle-Juul Jensens Boulevard 99, 8220 Aarhus N, Denmark.

<sup>8</sup> Istituto per lo Studio dei Materiali Nanostrutturati (CNR-ISMN), via P. Gobetti 101, 40129 Bologna, Italy.

<sup>9</sup> Department of Chemistry - University of Florence via della Lastruccia 3, 50019 Sesto Fiorentino, Italy.

#### Use of a modified calibration curve for EV quantification

Since not all the spectrophotometers are able to collect absorbance spectra in the specified range (400-900 nm) we tested the possibility to calculate the AI of liposome standards using slightly modified versions of eq. (1). Indeed, the use of the absorbance collected at 800 nm or 780 nm instead of the one collected at 850 nm causes minimal discrepancy in EV quantification. Such difference has been calculated to be < 1% for the samples used as working examples in the manuscript. Discrepancy sensibly grows whenever any absorbance value below Abs<sub>760nm</sub> is used.

**Figure S1** shows the comparison between the calibration curves plotted by replacing Abs<sub>850nm</sub> with other absorbance values.

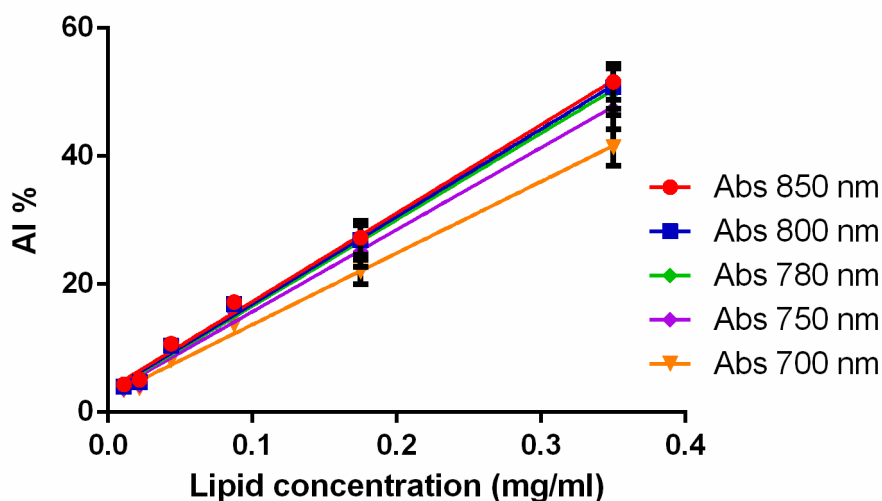

**Figure S1.** A comparison between the calibration curve obtained using the standard form of eq. (1) for *AI* calculation (red line) and the one obtained using its modified versions (blue, green, purple and orange lines).

### CONAN assay single aggregated protein (SAP) limit of detection (LOD) definition

The experiment was performed to measure CONAN assay LOD for SAPs.

Soluble proteins block the interaction between lipid membranes and AuNPs, due to the formation of a protein corona on AuNP surface. Aggregation impairment is progressive and follows the concentration of SAPs. In this experiment, a fixed amount of liposomes (0.022 mg/ml of lipids, equal to the second point of calibration line showed in **Figure 2D** in the manuscript) was mixed with increasing concentration of BSA (0, 0.002, 0.005, 0.01, 0.02, 0.05, 0.1, 0.2, 0.5 and 1  $\mu\text{g}/\mu\text{l}$ ) and tested with CONAN assay, as described in **section EV purity check** in the main text. AI ratio was calculated using **eq. (2)**. Results of the experiments are shown in **Figure S2**.

AI ratio starts to increase sensibly at a concentration of SAPs comprised between 0.02 and 0.05  $\mu\text{g}/\mu\text{L}$  (highlighted in yellow in **Figure S2**). Such range corresponds to an AI ratio of  $\sim 20\%$ , which has been therefore selected as CONAN assay SAP LOD.

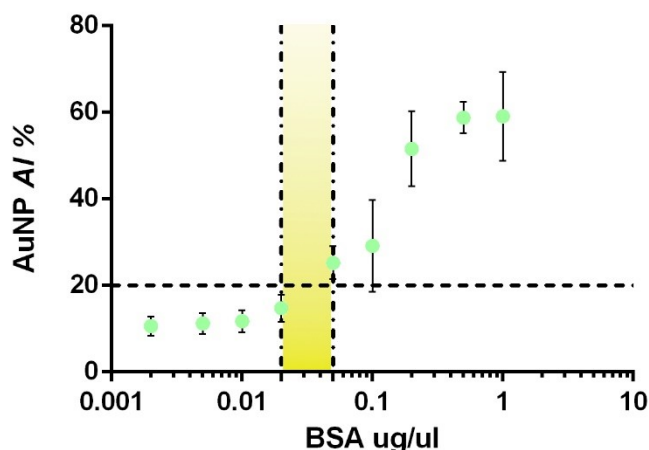

**Figure S2.** Determination of CONAN assay LOD for SAPs.

### **AFM imaging of pristine POPC liposomes and EVs before and after interaction with (citrate-capped) AuNPs**

The experiment was performed to visualize the formation of AuNPs clusters on to lipid membrane of POPC liposomes and EVs. Liposomes and EVs were mixed with the same AuNPs (citrate-capped, ~15 nm, 6 nM) used for CONAN assay and incubated at RT for 30 minutes. Five  $\mu$ L of liposomes or EVs were then deposited onto mica sheets and let to adsorb for 10 minutes at 4°C. The substrate was then inserted in the AFM fluid cell. AFM imaging was performed in ultrapure water at room temperature, using a Bruker Multimode 8 running in PeakForce mode equipped with Bruker SNL probes (nominal tip radius 2-10 nm, nominal spring constant 0.24 N/m). Image analysis was performed using Gwyddion 2.55 and custom Python scripts. Images **(A)** and **(C)** show a bare liposome and a AuNP-coated liposome, respectively. Images **(B)** and **(D)** show a bare EV and a AuNP-coated EV, respectively. The same particles are shown slightly magnified in the relative insets **(a)**, **(b)**, **(c)**, and **(d)**. A single AuNP and relative Z-scale bar is shown in inset **(e)**.

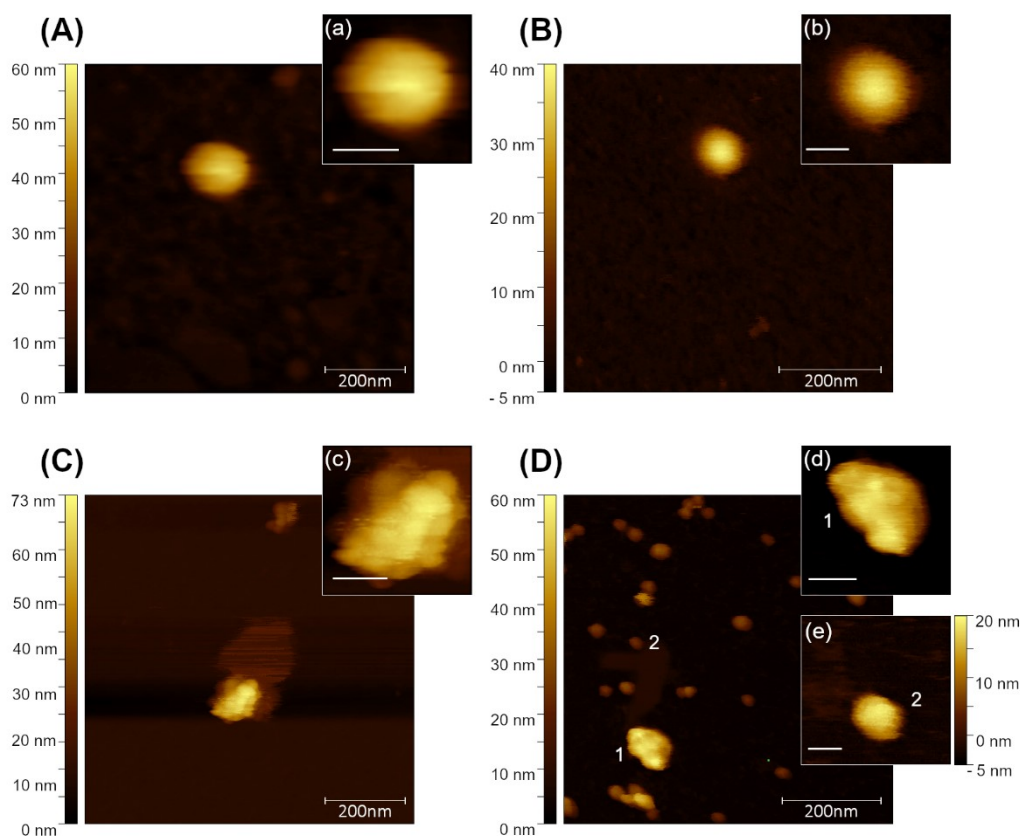

**Figure S3.** AFM analysis of POPC liposomes (A), EVs (B), AuNP-coated POPC liposomes (C) and AuNPs-coated EVs (D) (marked with number 1 in picture (D) and inset (d)). A zoom of the particles is shown in the relative insets. Inset (e) shows a single citrate-capped AuNP (marked with number 2 in picture (D)) imaged from picture (D). Scan size 700 nm x 700 nm. XY scale-bar size 200 nm for images (A), (B), (C), (D), 50 nm for insets (a), (b), (c) and (d), and 20 nm for inset (e).

#### **UV-Vis spectra of solvents used for liposome or EV resuspension**

The UV-Vis absorption spectra of HPLC water, PBS, 0.9% NaCl solution and HPLC water-PBS and HPLC water-0.9% NaCl solution (in the proportion used in the CONAN assay) are reported in **Figure S4**. The differences in absorption spectra are negligible.

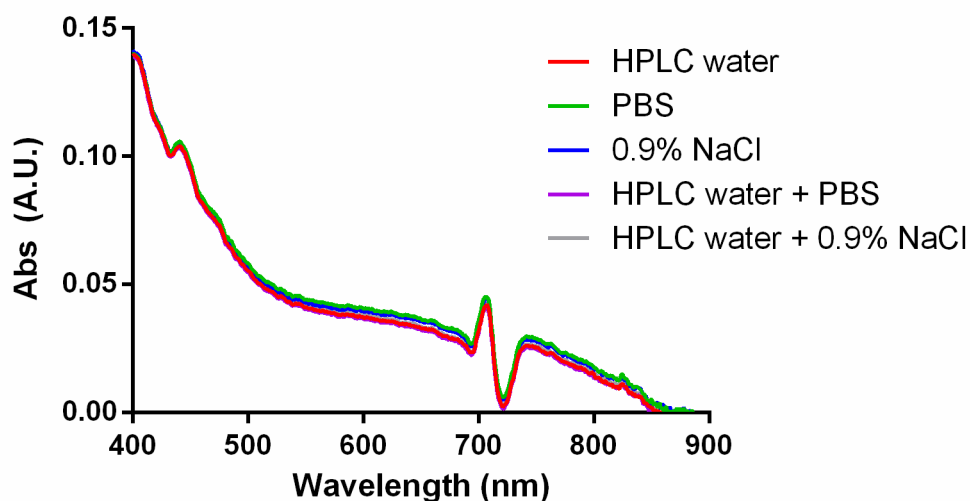

**Figure S4.** UV-Vis spectra of solvents used for liposome or EV resuspension: HPLC water (red line), PBS (green line), 0.9% NaCl solution (blue line), HPLC water-PBS (purple line) and HPLC water-0.9% NaCl solution (grey line). The differences in absorption spectra are negligible.

## Datasets

Datasets generated for this study are shown in this section.

| Lipid concentration mg/ml | AI ratio |          |          |
|---------------------------|----------|----------|----------|
| 0.35                      | 54.77881 | 49.37444 | 50.68038 |
| 0.175                     | 29.62578 | 27.77955 | 24.3611  |
| 0.0875                    | 17.75862 | 17.68823 | 16.18338 |
| 0.04375                   | 10.80469 | 11.12988 | 10.26112 |
| 0.02187                   | 5.270135 | 5.18036  | 4.827357 |
| 0.0109                    | 4.390049 | 4.41227  | 4.269877 |

**Table S1.** Dataset of 3 different replicates used for the calibration line showed in **Figure 2D**.

|                      | milk contaminated EVs 1:1 | milk contaminated milk EVs 1:10 | milk contaminated EVs 1:30 | <i>A. suum</i> pureEVs 1:1 | <i>A. suum</i> pure EVs 1:3 | <i>A. suum</i> pure EVs 1:5 |
|----------------------|---------------------------|---------------------------------|----------------------------|----------------------------|-----------------------------|-----------------------------|
| AI ratio replicate 1 | 64.31976                  | 69.54499                        | 69.74865                   | 43.96085                   | 10.97162                    | 9.358689                    |
| AI ratio replicate 2 | 61.29842                  | 62.37967                        | 59.34306                   | 32.79765                   | 11.08384                    | 9.772814                    |
| AI ratio replicate 3 | 69.68902                  | //                              | 59.9722                    | 45.05204                   | 12.33872                    | 10.7995                     |

|                            | normREF | intREF  | milk pure EVs<br>1:1 | milk pure EVs<br>1:10 | milk pure EVs<br>1:30 |
|----------------------------|---------|---------|----------------------|-----------------------|-----------------------|
| AI ratio<br>replicate<br>1 | 100     | 48.0285 | 71.16329             | 21.04964              | 18.60194              |
| AI ratio<br>replicate<br>2 | //      | 52.921  | 76.97102             | 18.03322              | 7.996666              |
| AI ratio<br>replicate<br>3 | //      | 47.8845 | 74.24379             | 22.33495              | 7.846751              |

**Tables S2.** Datasets of 3 different replicates used to plot CONAN assay graph shown in **Figure 3**.

| BSA $\mu\text{g}/\mu\text{l}$ | AI ratio |          |          |          |          |          |          |          |          |
|-------------------------------|----------|----------|----------|----------|----------|----------|----------|----------|----------|
| 0                             | 15.06636 | 14.30291 | 13.82577 | 8.357368 | 7.470352 | 12.10804 | 14.97612 | 15.26518 | 14.66718 |
| 0.002                         | 13.47745 | 12.5677  | 13.57003 | 9.547992 | 9.416581 | 11.55967 | 8.685877 | 8.33465  | 8.474903 |
| 0.005                         | 12.3509  | 14.79192 | 14.91365 | 10.65521 | 11.34508 | 10.12346 | 9.068083 | 8.153257 | 9.617648 |
| 0.01                          | 14.50453 | 15.45977 | 14.61107 | 9.286279 | 9.84427  | 12.44684 | 8.527717 | 10.32334 | 10.73204 |
| 0.02                          | 16.08653 | 17.45072 | 17.11289 | 15.81552 | 16.44981 | 17.82657 | 10.66893 | 11.73777 | 9.504291 |
| 0.05                          | 19.68529 | 21.52819 | 21.19415 | 27.23159 | 29.94349 | 27.20659 | 28.24414 | 26.78572 | //       |
| 0.1                           | 14.68987 | 16.03904 | 15.58114 | 32.24591 | 36.4959  | 39.31668 | 32.24591 | 36.4959  | 39.31668 |
| 0.2                           | 52.39283 | 42.46384 | 52.66331 | 59.33555 | 59.34299 | 39.72411 | 59.33555 | 59.34299 | 39.72411 |
| 0.5                           | 63.55705 | 55.19255 | 62.15158 | 59.54224 | 60.58446 | 54.01313 | 59.54224 | 60.58446 | 54.01313 |
| 1                             | 41.35793 | 46.59412 | 69.43673 | 57.1846  | 55.40801 | 63.60318 | 67.2089  | 71.79967 | 59.21967 |

**Table S3.** Dataset of 9 replicates used to plot the graph shown in **Figure S2**.

## Funding

This work was supported by the Center for Colloid and Surface Science (CSGI), Aarhus University and Utrecht University through the evFOUNDRY project, Horizon 2020-Future and emerging technologies (H2020-FETOPEN), ID: 801367.
